# Supplementary material
Source: MDPI journal article supplement (https://www.mdpi.com/2073-4441/15/20/3700)
Supplement: s1 [file s1]

**Table S1.** Basic information of sample collection in lakes and rivers.

| Sampling Sites | Station ID | Latitude (°N), Longitude (°E) | Altitude/(m) | Sampling Date (Day/Month/Year) |
|----------------|------------|-------------------------------|--------------|--------------------------------|
| Qinghai lake   | QHH1       | 37°11'52",99°48'34"           | 3200         | 18/6/2018                      |
|                | QHGH1-T    |                               |              | 18/6/2018                      |
| Qinghai-gahai  | QHGH1-B    | 37°01'19",100°34'48"          |              | 18/6/2018                      |
|                | QHGH2-T    |                               | 3200         | 18/6/2018                      |
|                | QHGH2-B    | 37°01'15",100°37'18"          |              | 18/6/2018                      |
|                |            |                               |              | 18/6/2018                      |
| Xiligou lake   | XLG1       | 36°49'10",98°26'52"           |              | 17/6/2018                      |
|                | XLG2       | 36°49'03",98°26'41"           | 2945         | 16/6/2018                      |
| Gahai          | GH1        | 37°07'51",97°34'58"           | 2859         | 15/6/2018                      |
|                | KLK1-T     |                               |              | 16/6/2018                      |
|                | KLK1-M     | 37°17'24",96°53'34"           | 2815         | 16/6/2018                      |
|                | KLK1-B     |                               |              | 16/6/2018                      |
| Keluke lake    | KLK2-T     |                               |              | 16/6/2018                      |
|                | KLK2-M     | 37°17'55",96°53'42"           | 2813         | 16/6/2018                      |
|                | KLK2-B     |                               |              | 16/6/2018                      |
|                | KLK3-T     |                               |              | 16/6/2018                      |
|                | KLK3-M     | 37°18'27",96°53'55"           | 2818         | 16/6/2018                      |
|                | TS1-T      |                               |              | 16/6/2018                      |
| Tuosu lake     | TS1-M      | 37°10'21",96°58'35"           | 2815         | 16/6/2018                      |
|                | TS2-T      |                               |              | 16/6/2018                      |
|                | TS2-M      | 37°10'28",96°58'59"           | 2808         | 16/6/2018                      |
|                | TS3        | 37°10'36",96°58'57"           | 2807         | 16/6/2018                      |
|                | SL1        | 37°37'18",99°58'17"           | 3590         | 18/6/2018                      |
| Shaliu river   | SL2        | 37°31'09",100°05'11"          | 3480         | 18/6/2018                      |
|                | SL3        | 37°19'43",100°07'28"          | 3280         | 18/6/2018                      |
| Haergai river  | HRG1       | 37°17'11",100°28'38"          | 3220         | 18/6/2018                      |
|                | BH1        | 37°22'35",98°50'34"           | 3480         | 17/6/2018                      |
| Buha river     | BH2        | 37°12'53",99°09'53"           | 3344         | 17/6/2018                      |
|                | BH3        | 37°08'06",99°30'59"           | 3249         | 17/6/2018                      |

Note: "T" means "Surface water", "M" means "Mid-water" and "B" means "Bottom water".



**Table S2.** Region I: The element concentration (pg/g) of the first type (elements related to the source of particulate detritus) and the third type (elements related to biological productivity). Region I: The element concentration (pg/g) of the second type (elements related to soluble in water and easy migration).

| Location    | Station | TSM/( $\mu\text{g/L}$ ) | The First Type    |                                |          |          | The Third Type                 |                  |                   |                   |
|-------------|---------|-------------------------|-------------------|--------------------------------|----------|----------|--------------------------------|------------------|-------------------|-------------------|
|             |         |                         | $^{232}\text{Th}$ | $^{27}\text{Al}\times 10^{-3}$ | Al/Th    | Th/U     | $^{56}\text{Fe}\times 10^{-3}$ | $^{66}\text{Zn}$ | $^{111}\text{Cd}$ | $^{137}\text{Ba}$ |
| Keluke Lake | KLK1-S  | 95.56                   | 4.54              | 19.19                          | 4.23E+03 | 1.91E+00 | 12.70                          | 538.64           | 0.23              | 373.16            |
|             | KLK1-M  | 1873.66                 | 3.21              | 13.07                          | 4.07E+03 | 9.08E-01 | 9.54                           | 385.91           | -                 | 313.83            |
|             | KLK1-B  | 5169.81                 | 3.08              | 10.84                          | 3.53E+03 | 1.34E+00 | 8.44                           | 631.93           | 0.14              | 281.48            |
|             | KLK2-S  | 2933.27                 | 2.95              | 10.65                          | 3.61E+03 | 2.10E+00 | 7.24                           | 2389.7           | -                 | 223.06            |
|             | KLK2-M  | 3019.14                 | 3.40              | 13.45                          | 3.96E+03 | 1.79E+00 | 9.42                           | 1288.8           | 0.41              | 279.50            |
|             | KLK2-B  | 6681.67                 | 92.65             | 333.27                         | 3.60E+03 | 7.43E+00 | 204.9                          | 904.88           | 1.23              | 2971.0            |
|             | KLK3-S  | 7600.00                 | 118.4             | 427.91                         | 3.61E+03 | 7.82E+00 | 258.9                          | 1230.4           | 3.54              | 3648.0            |
|             | KLK3-M  | 907.21                  | 6.26              | 19.90                          | 3.18E+03 | 3.57E-01 | 12.99                          | 307.03           | 0.51              | 483.51            |
|             | TS1-S   | 11161.29                | 7.37              | 23.56                          | 3.20E+03 | 5.96E-01 | 15.38                          | 803.12           | 0.83              | 414.90            |
|             | TS1-M   | 3849.05                 | 7.74              | 23.50                          | 3.04E+03 | 8.40E-01 | 14.86                          | 799.97           | 0.29              | 404.34            |
| Tuosu Lake  | TS2-M   | 10383.84                | 6.26              | 22.23                          | 3.55E+03 | 5.03E-01 | 13.95                          | 777.20           | 0.33              | 434.53            |
|             | TS3     | 9172.41                 | 6.27              | 21.79                          | 3.48E+03 | 5.58E-01 | 13.12                          | 338.84           | 1.78              | 316.92            |



| Gahai       | GH1     | 15598.00        | 83.96                               | 261              | -                | -                | 165.6            | 2656.2 | 1.77 | 1234.5 |
|-------------|---------|-----------------|-------------------------------------|------------------|------------------|------------------|------------------|--------|------|--------|
| 7           |         |                 |                                     |                  |                  |                  |                  |        |      |        |
| Location    | Station | <sup>7</sup> Li | <sup>24</sup> Mg × 10 <sup>-3</sup> | <sup>47</sup> Ti | <sup>88</sup> Sr | <sup>95</sup> Mo | <sup>238</sup> U |        |      |        |
| Keluke Lake | KLK1-S  | 18.54           | 18.12                               | 784.45           | 791.76           | 1.70             | 2.37             |        |      |        |
|             | KLK1-M  | 15.57           | 26.44                               | 495.66           | 863.45           | 2.56             | 3.54             |        |      |        |
|             | KLK1-B  | 3.78            | 17.98                               | 303.12           | 788.55           | 2.05             | 2.30             |        |      |        |
|             | KLK2-S  | -               | 13.56                               | 386.39           | 485.16           | 1.03             | 1.40             |        |      |        |
|             | KLK2-M  | -               | 20.03                               | 510.48           | 663.64           | 2.14             | 1.90             |        |      |        |
|             | KLK2-B  | 304.37          | 114.20                              | 9421.61          | 3013.34          | 7.37             | 12.47            |        |      |        |
|             | KLK3-S  | 325.71          | 137.37                              | 11471.13         | 4020.46          | 9.20             | 15.14            |        |      |        |
| Tuosu Lake  | KLK3-M  | 296.35          | 753.44                              | 758.78           | 3692.64          | 4.81             | 17.53            |        |      |        |
|             | TS1-S   | 206.35          | 504.79                              | 854.60           | 2976.37          | 4.38             | 12.36            |        |      |        |
|             | TS1-M   | 128.15          | 352.84                              | 933.89           | 2506.03          | 2.68             | 9.22             |        |      |        |
|             | TS2-M   | 172.64          | 535.00                              | 801.03           | 2804.23          | 3.76             | 12.45            |        |      |        |
| Gahai       | TS3     | 139.38          | 472.94                              | 720.91           | 2108.62          | 3.19             | 11.23            |        |      |        |
|             | GH1     | 273.36          | 327.30                              | 15768.01         | 4805.27          | 12.48            | 19.24            |        |      |        |



**Table S3.** Region II: The element concentration (pg/g) of the first type (elements related to the source of particulate detritus) and the third type (elements related to biological productivity). Region II: The element concentration (pg/g) of the second type (elements related to soluble in water and easy migration).

| Location      | Station | TSM/( $\mu\text{g/L}$ ) | The First Type    |                                |                                | The Third Type   |                   |                   |
|---------------|---------|-------------------------|-------------------|--------------------------------|--------------------------------|------------------|-------------------|-------------------|
|               |         |                         | $^{232}\text{Th}$ | $^{27}\text{Al}\times 10^{-3}$ | $^{56}\text{Fe}\times 10^{-3}$ | $^{66}\text{Zn}$ | $^{111}\text{Cd}$ | $^{137}\text{Ba}$ |
| Qinghai Lake  | QHH1    | 415960                  | 262.89            | 855                            | 536.2                          | 1470             | 10.28             | 2702              |
|               | QHGH1-T | 265940                  | 6.84              | 20.7                           | 13.62                          | 108.87           | 0.31              | 371               |
| Qinghaigahai  | QHGH1-B | 192940                  | 3.97              | 9.02                           | 5.90                           | 445.6            | 0.58              | 282               |
|               | QHGH2-T | 229250                  | 2.89              | 8.00                           | 5.69                           | 1363.1           | -                 | 255               |
|               | QHGH2-B | 148130                  | 10.95             | 30.4                           | 18.25                          | 372.3            | 0.52              | 563               |
| Xiligou Lake  | XLG1    | 6012                    | 0.63              | 2.93                           | 2.28                           | 443              | -                 | 133               |
|               | XLG2    | 59915                   | 180               | 531                            | 315                            | 962              | 2.13              | 3990              |
| Shaliu River  | SL2     | 29340                   | 253               | 1060                           | 485                            | 1270             | 4.08              | 7190              |
|               | SL3     | 165710                  | 1060              | 4580                           | 2450                           | 5070             | 16.6              | 34400             |
| Haergai River | HRG1    | 115930                  | 89.79             | 307.7                          | 160.0                          | 678.77           | 1.26              | 2608.01           |
| Buha River    | BH1     | 242240                  | 501.85            | 1780                           | 934.8                          | 2402.42          | 12.55             | 15221.07          |

  

| Location      | Station | $^7\text{Li}$ | $^{24}\text{Mg} \times 10^{-3}$ | $^{47}\text{Ti}$ | $^{88}\text{Sr}$ | $^{95}\text{Mo}$ | $^{238}\text{U}$ |
|---------------|---------|---------------|---------------------------------|------------------|------------------|------------------|------------------|
| Qinghai Lake  | QHH1    | 985           | 527.1                           | 52476.11         | 3767.82          | 5.85             | 41.12            |
|               | QHGH1-T | 298           | 278.0                           | 837.14           | 1080.32          | 1.73             | 4.89             |
| Qinghaigahai  | QHGH1-B | 371           | 254.4                           | 438.53           | 942.68           | 1.19             | 4.34             |
|               | QHGH2-T | 186           | 204.0                           | 313.20           | 758.42           | 0.82             | 3.31             |
|               | QHGH2-B | 520           | 377.0                           | 882.73           | 1848.08          | 2.45             | 6.26             |
| Xiligou Lake  | XLG1    | 22.4          | 98                              | 107              | 1070             | 3.85             | 15               |
|               | XLG2    | 367           | 174                             | 31000            | 3570             | 9.48             | 27               |
| Shaliu River  | SL2     | 631           | 138                             | 25600            | 1340             | 8.65             | 25.5             |
|               | SL3     | 2180          | 453                             | 148000           | 5940             | 42.9             | 123              |
| Haergai River | HRG1    | 176.39        | 92213.48                        | 14397.26         | 554.59           | 5.70             | 11.06            |
| Buha River    | BH1     | 1370.94       | 537490.57                       | 62387.13         | 7241.33          | 8.45             | 66.10            |



**Table S4.** Region I: Composition characteristics of rare earth elements in lake particulate matter (ppm).

| Site        | Station | La        | Ce        | Pr    | Nd    | Sm    | Eu    | Gd    | Tb    | Dy    | Ho   | Er   | Tm        | Yb   | Lu   |
|-------------|---------|-----------|-----------|-------|-------|-------|-------|-------|-------|-------|------|------|-----------|------|------|
| Keluke lake | KLK1-M  | 10.6<br>3 | 7.3<br>2  | 4.36  | 6.51  | 3.34  | 2.62  | 2.32  | 1.91  | 0.97  | 0.93 | 1.47 | 1.38      | 1.72 | 2.32 |
|             | KLK1-B  | 2.85      | 2.1<br>5  | 1.42  | 1.96  | 0.56  | 1.12  | 1.06  | 0.22  | 0.55  | 0.37 | 0.27 | -         | -    | 0.08 |
|             | KLK2-T  | 5.11      | 3.7<br>9  | 2.05  | 3.29  | 1.09  | 1.91  | 1.90  | 0.45  | 0.60  | 0.83 | 0.45 | 0.56      | 0.04 | -    |
|             | KLK2-M  | 5.96      | 4.4<br>2  | 3.21  | 3.76  | 1.76  | 3.51  | 1.33  | 0.44  | 0.86  | 0.73 | 0.60 | 0.56      | 0.52 | 0.98 |
|             | KLK2-B  | 65.2<br>7 | 48.<br>09 | 34.05 | 45.21 | 24.43 | 16.84 | 21.66 | 15.06 | 9.46  | 8.27 | 8.08 | 9.00      | 6.85 | 7.45 |
|             | KLK3-T  | 70.1<br>6 | 52.<br>76 | 38.15 | 49.92 | 26.05 | 20.36 | 24.72 | 15.56 | 10.45 | 9.01 | 8.33 | 7.74      | 9.26 | 7.95 |
|             | KLK3-M  | 35.2<br>2 | 26.<br>25 | 20.65 | 22.34 | 9.50  | 13.63 | 11.54 | 11.57 | 6.02  | 6.60 | 3.64 | 11.5<br>9 | 2.51 | 9.95 |
| Tuosu lake  | TS1-T   | 3.49      | 2.4<br>0  | 1.95  | 2.28  | 1.18  | 1.62  | 1.29  | 0.92  | 0.70  | 0.76 | 0.49 | 1.14      | 0.50 | 0.89 |
|             | TS1-M   | 9.22      | 6.9<br>1  | 4.99  | 6.87  | 2.39  | 2.59  | 2.82  | 1.86  | 1.24  | 1.71 | 1.19 | 1.57      | 1.30 | 1.18 |
|             | TS2-T   | 1.87      | 1.5<br>0  | 1.12  | 1.22  | 0.70  | 0.91  | 0.63  | 0.60  | 0.24  | 0.47 | 0.45 | 0.33      | 0.18 | 0.03 |
|             | TS2-M   | 3.27      | 2.6<br>4  | 1.84  | 2.27  | 0.91  | 1.40  | 0.91  | 0.52  | 0.61  | 0.41 | 0.40 | 0.36      | 0.52 | 0.27 |
|             | TS3     | 3.95      | 2.9<br>9  | 2.20  | 2.84  | 1.42  | 1.71  | 1.44  | 1.03  | 0.76  | 0.64 | 0.39 | 0.79      | 0.55 | 1.12 |
| Gahai       | GH1     | 30.8<br>7 | 23.<br>43 | 17.44 | 21.49 | 11.44 | 7.42  | 11.06 | 6.73  | 5.09  | 4.75 | 4.84 | 4.55      | 4.58 | 4.46 |

Note: “-” represents “no data”.



**Table S5.** Region II: Composition characteristics of rare earth elements in lake and nearby river particulate matter (ppm).

| Site            | Station | La    | Ce    | Pr    | Nd    | Sm    | Eu    | Gd    | Tb   | Dy   | Ho   | Er   | Tm   | Yb   | Lu   |
|-----------------|---------|-------|-------|-------|-------|-------|-------|-------|------|------|------|------|------|------|------|
| Shaliu river    | SL2     | 43.77 | 32.66 | 24.45 | 29.39 | 16.48 | 11.63 | 13.23 | 7.80 | 4.79 | 4.60 | 4.18 | 4.50 | 4.80 | 4.48 |
|                 | SL3     | 29.78 | 20.41 | 17.09 | 20.73 | 11.90 | 7.36  | 8.93  | 4.36 | 3.48 | 3.32 | 3.47 | 3.38 | 3.60 | 3.88 |
| Haergai river   | HRG1    | 3.85  | 2.84  | 2.05  | 2.59  | 1.47  | 0.93  | 1.38  | 0.99 | 0.70 | 0.58 | 0.59 | 0.59 | 0.66 | 0.57 |
|                 | BH1     | 4.18  | 3.05  | 2.27  | 2.75  | 1.69  | 1.09  | 1.42  | 0.95 | 0.70 | 0.64 | 0.62 | 0.63 | 0.66 | 0.66 |
| Buha river      | BH2     | 8.60  | 6.37  | 4.76  | 5.82  | 3.39  | 2.23  | 3.09  | 2.07 | 1.55 | 1.36 | 1.38 | 1.41 | 1.46 | 1.32 |
|                 | BH3     | 4.40  | 3.30  | 2.50  | 3.06  | 1.87  | 1.33  | 1.54  | 0.99 | 0.66 | 0.60 | 0.57 | 0.58 | 0.56 | 0.54 |
| Qinghai lake    | QHH1    | 3.40  | 2.55  | 1.87  | 2.24  | 1.34  | 0.69  | 1.13  | 0.76 | 0.53 | 0.46 | 0.48 | 0.49 | 0.52 | 0.48 |
|                 | QHGH1-T | 0.13  | 0.10  | 0.07  | 0.07  | 0.06  | 0.04  | 0.05  | 0.03 | 0.02 | 0.02 | 0.01 | 0.03 | 0.01 | 0.03 |
| Qinghaigai lake | QHGH1-B | 0.09  | 0.07  | 0.05  | 0.07  | 0.04  | 0.03  | 0.05  | 0.02 | 0.02 | 0.02 | 0.01 | 0.03 | 0.01 | 0.00 |
|                 | QHGH2-T | 0.12  | 0.09  | 0.06  | 0.10  | 0.07  | 0.06  | 0.04  | 0.02 | 0.01 | 0.03 | 0.01 | 0.04 | 0.02 | 0.00 |
|                 | QHGH2-B | 0.15  | 0.11  | 0.09  | 0.12  | 0.07  | 0.05  | 0.07  | 0.03 | 0.02 | 0.03 | 0.02 | 0.03 | 0.03 | 0.04 |
| Xiligou lake    | XLG2    | 17.31 | 12.85 | 9.64  | 11.79 | 6.78  | 4.10  | 6.07  | 4.02 | 2.69 | 2.46 | 2.23 | 2.30 | 2.50 | 2.01 |
